# Supplementary material
Source: PubMed Central journal article supplement (PMC3524941)
Supplement: 97320630008996S1.pdf [file 97320630008996S1.pdf]

## Supplementary material:

**Table 1:** Results of the processing of fragment and mate-pair libraries

| Feature            | Fragments |            | Mate-paired |            |
|--------------------|-----------|------------|-------------|------------|
|                    | Raw data  | Simplifier | Raw data    | Simplifier |
| Number of Contigs  | 24,344    | 18,523     | 17,149      | 14,153     |
| N50                | 552       | 642        | 697         | 717        |
| Blastx vs NR(time) | 109h36m   | 91h59m     | 103h4m      | 87h32m     |
| Blast hits         | 4,171,658 | 3,178,597  | 3,309,206   | 2,734,811  |

NR - NCBI non-redundant databank. Comparative analysis of the number of contigs, value of N50, time for execution of Blast and quantity of hits generated, among the contigs originated from the mate-pair and fragment libraries of *Escherichia coli* DH10B before and after the application of Simplifier.

**Table 2:** Number of *Escherichia coli* DH10B contigs eliminated using Simplifier

| Library     | Size range (bp) |         |         |             |             |
|-------------|-----------------|---------|---------|-------------|-------------|
|             | Up to 100       | 101-499 | 501-999 | 1,000-1,999 | 2,000-2,999 |
| Mate-paired | 12              | 2,056   | 723     | 198         | 7           |
| Fragments   | 117             | 5,134   | 517     | 53          | 0           |

Number of contigs removed by applying Simplifier to mate-paired and fragment library data, classified by contig length.
